# Supplementary material
Source: PubMed Central journal article supplement (PMC7233280)
Supplement: NIHMS1569276-supplement-2.pdf [file NIHMS1569276-supplement-2.pdf]

| Mass [H+] | Monosaccharide composition | Abundance in supplement (%) | Pre-supplementation |      |         |         | Post-supplementation |      |         |         |
|-----------|----------------------------|-----------------------------|---------------------|------|---------|---------|----------------------|------|---------|---------|
|           |                            |                             | Mean                | SD   | Minimum | Maximum | Mean                 | SD   | Minimum | Maximum |
| 505·1763  | 3 Hex                      | 19.9                        | 3.62                | 5.45 | 0.27    | 22.34   | 2.51                 | 2.09 | 0.15    | 7.21    |
| 546·2029  | 2 Hex 1 HexNAc             | 9.4                         | 0.12                | 0.16 | 0.01    | 0.51    | 0.28                 | 0.37 | 0.01    | 1.43    |
| 634·2189  | 2 Hex 1 NeuAc              | 45.7                        | 1.03                | 0.84 | 0.20    | 2.69    | 1.15                 | 0.75 | 0.11    | 2.34    |
| 667·2293  | 4 Hex                      | 5.8                         | 5.53                | 9.17 | 0.52    | 37.77   | 4.30                 | 2.98 | 0.59    | 11.40   |
| 675·2454  | 1 Hex 1 HexNAc 1 NeuAc     | 0.4                         | 0.05                | 0.06 | 0.00    | 0.24    | 0.06                 | 0.10 | 0.01    | 0.43    |
| 691·2404  | 1 Hex 1 HexNAc 1 NeuGc     | 0.7                         | n.m.                | n.m. | n.m.    | n.m.    | n.m.                 | n.m. | n.m.    | n.m.    |
| 708·2557  | 3 Hex 1 HexNAc             | 3.8                         | 0.86                | 2.63 | 0.02    | 10.69   | 0.77                 | 2.48 | 0.03    | 10.36   |
| 749·2822  | 2 Hex 2 HexNAc             | 0.7                         | n.m.                | n.m. | n.m.    | n.m.    | n.m.                 | n.m. | n.m.    | n.m.    |
| 796·2717  | 3 Hex 1 NeuAc              | 0.9                         | 0.14                | 0.21 | 0.01    | 0.61    | 0.19                 | 0.24 | 0.00    | 0.61    |
| 829·2821  | 5 Hex                      | 4.1                         | 2.55                | 2.06 | 0.16    | 6.77    | 3.41                 | 3.05 | 0.40    | 13.24   |
| 870·3085  | 4 Hex 1 HexNAc             | 3.2                         | 0.19                | 0.29 | 0.00    | 0.87    | 0.35                 | 0.84 | 0.01    | 3.54    |
| 911·3352  | 3 Hex 2 HexNAc             | 0.7                         | 0.70                | 0.94 | 0.02    | 3.48    | 1.11                 | 1.44 | 0.01    | 6.12    |
| 991·335   | 6 Hex                      | 2.6                         | 2.39                | 4.81 | 0.01    | 15.12   | 1.15                 | 2.22 | 0.01    | 9.73    |
| 1073·388  | 4 Hex 2 HexNAc             | 0.7                         | 0.41                | 0.69 | 0.00    | 1.68    | 0.52                 | 1.23 | 0.00    | 3.92    |
| 1114·415  | 3 Hex 3 HexNAc             | 0.6                         | 0.13                | 0.23 | 0.01    | 0.88    | 0.21                 | 0.39 | 0.01    | 1.45    |
| 1153·387  | 7 Hex                      | 0.6                         | n.m.                | n.m. | n.m.    | n.m.    | n.m.                 | n.m. | n.m.    | n.m.    |
| 1315·440  | 8 Hex                      | 0.2                         | n.m.                | n.m. | n.m.    | n.m.    | n.m.                 | n.m. | n.m.    | n.m.    |

\*Note: "Pre-supplementation" includes all Day 0 samples from arms T2 and T3. "Post-supplementation" includes all Day 11 samples from arms T2 and T3.
